# Supplementary material for: Molecular Epidemiology and Species Diversity of Tick-Borne Pathogens of Animals in Egypt: A Systematic Review and Meta-Analysis
Source: MDPI journal article supplement (doi:10.3390/pathogens11080912), 2022-08-14
Supplement: s1 [file s1]

**Supplementary Table S1:** Study characteristics of tick-borne pathogens molecular surveys in cattle and buffaloes from Egypt.

| Reference                     | Region                            | Host      | Study Year | Sample size | No. positive (%)                     | Marker          | Species                                                    | Molecular tools              | Sequenced isolates  | Accession numbers                                                                    |                                       |
|-------------------------------|-----------------------------------|-----------|------------|-------------|--------------------------------------|-----------------|------------------------------------------------------------|------------------------------|---------------------|--------------------------------------------------------------------------------------|---------------------------------------|
| Mahmmod et al., 2010          | Sharkeya, Dekhlia, Ismalia        | Bovine    | NS         | 30#         | 21 (70)                              | NS              | <i>Th. annulata</i>                                        | cPCR                         | -                   | -                                                                                    |                                       |
| Abd Ellah and AL-Hosary, 2011 | Assuit                            | cattle    | NS         | 28          | 27 (96.42)                           | Tams-1          | <i>Th. annulata</i>                                        | cPCR                         | -                   | -                                                                                    |                                       |
| Nayel et al., 2012            | Menofia                           | cattle    | NS         | 158         | 20 (12.66)<br>38 (24.05)             | 18S rRNA        | <i>Babesia sp.</i><br><i>Theileria sp.</i>                 | cPCR                         | -                   | -                                                                                    |                                       |
| Ibrahim et al., 2013          | Beheira and Faiyum                | cattle    | 2011       | 151         | 8 (5.30)                             | RAP-1a          | <i>B. bigemina</i>                                         | nPCR                         | 3                   | KF192810-KF192812                                                                    |                                       |
|                               |                                   | 6 (3.97)  |            |             | SBP-4                                | <i>B. bovis</i> | 2                                                          | KF192806-KF192808            |                     |                                                                                      |                                       |
|                               |                                   | buffaloes |            | 96          | 0 (0)                                | RAP-1a<br>SBP-4 | <i>B. bigemina</i>                                         | 2                            | KF192809            |                                                                                      |                                       |
|                               |                                   |           |            |             | 10 (10.42)<br>4 (4.17)<br>0 (0)      |                 | <i>B. bovis</i><br>Mixed sp.                               | 1                            | KF192805            |                                                                                      |                                       |
| Abdel Aziz et al., 2014       | Sharkeya                          | cattle    | NS         | 296         | 117 (39.5)<br>44 (14.8)<br>73 (24.7) | RRA<br>RAP-1    | <i>Babesia sp</i><br><i>B. bovis</i><br><i>B. bigemina</i> | nPCR                         | -                   | -                                                                                    |                                       |
| Elhelw et al., 2014           | NS                                | cattle    | 2008-2009  | 25          | 4 (16)                               | OspA            | <i>B. burgdorferi</i>                                      | cPCR                         | 1                   | KC522030                                                                             |                                       |
| Ghoneim and El-Fayomy, 2014   | Port Said                         | cattle    | NS         | 64          | 44 (68.8)                            | Tams-1          | <i>Th. annulata</i>                                        | cPCR                         | 2                   | KF765518 and KF765519                                                                |                                       |
| AL-Hosary et al., 2015        | Upper Egypt                       | cattle    | 2010-2013  | 210         | 97 (46.19)                           | Tams-1          | <i>Th. annulata</i>                                        | cPCR                         | 4                   | KJ021626- KJ021629                                                                   |                                       |
| El-Ashker et al., 2015        | Dakahlia                          | cattle    | 2012-2013  | 164         | 13                                   | 18S rRNA        | <i>Babesia sp.</i>                                         | cPCR<br>DNA array<br>cPCR    | NS                  | Sequencing performed but, no GeneBank submitted accession numbers                    |                                       |
|                               |                                   |           |            |             | 12                                   |                 | <i>B. bovis</i>                                            |                              |                     |                                                                                      |                                       |
|                               |                                   |           |            |             | 2                                    |                 | <i>B. bigemina</i>                                         |                              |                     |                                                                                      |                                       |
| Elsify et al., 2015           | Menoufia, Behera, Giza, and Sohag | cattle    | 2013       | 439         | 35                                   | 16S rRNA        | <i>A. marginale</i>                                        | nPCR<br>cPCR<br>cPCR<br>cPCR | 11<br>10<br>14<br>3 | AB917246-AB917257<br>AB917263-AB917274<br>AB917275-AB917302<br>AB917303 and AB917305 |                                       |
|                               |                                   |           |            |             | 14 (3.18)                            |                 | RAP-1                                                      |                              |                     |                                                                                      | <i>B. bovis</i>                       |
|                               |                                   |           |            |             | 35 (7.97)                            |                 | AMA-1                                                      |                              |                     |                                                                                      | <i>B. bigemina</i> ,<br>Mixed Babesia |
|                               |                                   |           |            |             | 4 (0.9)                              |                 | Tams-1                                                     |                              |                     |                                                                                      | <i>T. annulata</i> ,                  |
|                               |                                   |           |            |             | 42 (9.56)<br>3 (0.68)                |                 | MPSP                                                       |                              |                     |                                                                                      | <i>T. orientalis</i>                  |

|                             |                                             |                     |           |          |                                      |                                      |                                                                                                                                              |                                  |                      |                                                                                                                                                                   |
|-----------------------------|---------------------------------------------|---------------------|-----------|----------|--------------------------------------|--------------------------------------|----------------------------------------------------------------------------------------------------------------------------------------------|----------------------------------|----------------------|-------------------------------------------------------------------------------------------------------------------------------------------------------------------|
|                             |                                             | buffaloes           |           | 50       | 4 (0.9)<br>1 (2.00)<br>1 (2.00)      | RAP-1<br>MPSP                        | Mixed Theleiria<br><i>B. bovis</i><br><i>T. orientalis</i>                                                                                   | nPCR<br>cPCR                     | 1<br>1               | AB917258<br>AB917306                                                                                                                                              |
| Mahmoud et al., 2015        | Kafr El-Sheikh, El-Beheira, Cairo           | cattle              | NS        | 253      | 38 (15.0)<br>82 (32.4)<br>22 (8.7)   | rra<br>rap-1c                        | <i>B. bovis</i><br><i>B. bigemina</i><br>Mixed 2 sp.                                                                                         | nPCR                             | 1<br>1               | KM213000<br>KM212998                                                                                                                                              |
|                             |                                             | buffaloes           |           | 81       | 3 (3.7)<br>0 (0.0)                   | rra<br>rap-1c                        | <i>B. bovis</i><br><i>B. bigemina</i>                                                                                                        |                                  |                      |                                                                                                                                                                   |
| Elhaig et al., 2016         | Ismailia, Sharkia and Qalubiya              | cattle              | 2013-2014 | 500      | 55 (11)                              | 18S rRNA                             | <i>B. bigemina</i>                                                                                                                           | cPCR                             | 1                    | KM076937                                                                                                                                                          |
| AL-Hosary, 2017             | Assuit                                      | cattle              | NS        | 76       | 13 (17.11)<br>20 (26.3)<br>20 (26.3) | 18S rRNA                             | <i>B. bovis</i>                                                                                                                              | cPCR<br>nPCR<br>PCR-RLB          | 3                    | KM455548, KM455549 and KM455550                                                                                                                                   |
| Abdel-Moein and Hamza, 2017 | Giza                                        | cattle<br>buffaloes | NS        | 26<br>26 | 0<br>0                               | IS1111                               | <i>C. burnetii</i>                                                                                                                           | nPCR                             | -                    | -                                                                                                                                                                 |
| ELHariri et al., 2017       | Giza, Qalyoubia, El-Wadi El-Gadeed, Menofia | buffaloes           | NS        | 150      | 104 (69.3)                           | msp1α                                | <i>A. marginale</i>                                                                                                                          | cPCR                             | -                    | -                                                                                                                                                                 |
| Rizk et al., 2017           | Menoufia, Behera, Giza, and Sohag           | cattle              | 2013      | 439      | 49 (11.16)<br><br>45 (10.25)         | RAP-1<br>AMA-1<br><br>Tams-1<br>MPSP | <i>Babesia</i> sp<br><i>B. bovis</i><br><i>B. bigemina</i><br><i>Theileria</i> sp.<br><i>T. annulata</i><br><i>T. orientalis</i>             | nPCR<br>cPCR<br><br>cPCR<br>cPCR | 5<br>2<br><br>5<br>2 | AB917246, AB917251, AB917253, AB917255, and AB917257<br>AB917263 and AB917274<br><br>AB917275, AB917298, AB917299, AB917300 and AB917302<br>AB917303 and AB917304 |
| AL-Hosary et al., 2018      | EL-Wady EL-Geded                            | cattle              | 2015-2016 | 1068     | 679 (63.6)<br>-----                  | Tams-1,<br>18Ss rRNA                 | <i>Th. annulata</i>                                                                                                                          | cPCR<br>nPCR                     | 13                   | KU550947- KU550959                                                                                                                                                |
| Abdel-Baky and Allam, 2018  | Variable                                    | cattle              | 2014-2016 | 40       | 23 (17.83)<br>6<br>4<br>2<br>1<br>10 | 16S rRNA<br>msp4 and hsp60           | <i>Anaplasmataceae</i><br><i>A. phagocytophilum</i><br><i>A. marginale</i><br><i>A. bovis</i><br><i>A. centrale</i><br><i>Anaplasma</i> spp. | cPCR                             | -                    | Sequencing performed but, no GeneBank submitted accession numbers                                                                                                 |

|                          |                                                |                  |           |         |                                                                    |                                              |                                                                                                                                    |                          |         |                                                                          |
|--------------------------|------------------------------------------------|------------------|-----------|---------|--------------------------------------------------------------------|----------------------------------------------|------------------------------------------------------------------------------------------------------------------------------------|--------------------------|---------|--------------------------------------------------------------------------|
| Allam et al., 2018       | Variable                                       | cattle           | 2014-2016 | 40      | 6 (5.88)                                                           | 16S rDNA, OmpA and gltA                      | <i>Rickettsiae</i>                                                                                                                 | cPCR                     | -       | Sequencing performed but, no GeneBank submitted accession numbers        |
| El-Dakhly et al., 2018   | El-Wadi El-Gadid                               | cattle           | NS        | 376     | 43 (11.44)                                                         | Cytb1                                        | <i>T. annulata</i>                                                                                                                 | cPCR                     | -       | -                                                                        |
| Anter et al., 2019¥      | Sharkia                                        | cattle buffaloes | 2018      | 30# 29# | NS NS                                                              | Tams1                                        | <i>T. annulata</i>                                                                                                                 | cPCR                     | 1 1     | MN251047 MN251046                                                        |
| AL-Hosary et al., 2020®  | EL-Minia and Assiut, EL Fayoum, and New Valley | cattle           | 2018      | 309     | 211 (68.3) 155 (50.2) 49 (15.9) 18 (5.8) 2 (0.7) 1 (0.3%) 26 (8.4) | msp1β groEL 18S rRNA 18S rRNA 18S rRNA groEL | <i>A. marginale</i> <i>A. marginale</i> <i>T. annulata</i> <i>B. bovis</i> <i>B. bigemina</i> <i>B. occultans</i> <i>A. platys</i> | qPCR RLB RLB RLB RLB RLB |         | MN227687, MN227689-MN227692 MN223723-MN223737 MN227676-MN227679 MN227675 |
|                          |                                                | buffaloes        |           | 85      | 25 (29.4) 36 (42.4) 1 (1.18) 2 (2.35) 4 (4.71)                     | msp1β groEL 18S rRNA 18S rRNA 16S rRNA       | <i>A. marginale</i> <i>A. marginale</i> <i>T. annulata</i> <i>B. bigemina</i> <i>A. platys</i>                                     | qPCR RLB RLB RLB RLB     |         | MN202017-MN202023 and MN227688                                           |
| Abbass et al., 2020      | Assiut                                         | cattle           | 2016-2017 | 38*     | 12 (31.6)                                                          | IS1111                                       | <i>C. burnetii</i>                                                                                                                 | RT-qPCR                  | -       | -                                                                        |
| Abdel-Baky et al., 2020¥ | NS                                             | cattle           | 2014-2016 | 40      | 22.22%                                                             | OspA and flaB                                | <i>B. burgdorferi</i>                                                                                                              | nPCR                     | -       | -                                                                        |
| El-Dakhly et al., 2020   | Beni-Suef, El-Fayoum and El-Wadi El-Gadid      | cattle           | 2015-2018 | 150     | 33 (22) 29 (19.33) 16 (10.6)                                       | Tams1 SSrRNA msp1b                           | <i>T. annulata</i> <i>B. bigemina</i> <i>A. marginale</i>                                                                          | cPCR cPCR cPCR           | 3 3 3   | MH796632- MH796634 MH796638-MH796640 MH796635-MH796637                   |
| Nasreldin et al., 2020   | New Valley                                     | cattle           | 2017-2018 | 14#     | 12 14                                                              | msp1b VESA-1a                                | <i>A. marginale</i> <i>B. bovis</i>                                                                                                | cPCR cPCR                | -       | -                                                                        |
| Tumwebaze et al., 2020   | Menoufia                                       | cattle           | 2017      | 92      | 5 (5.4) 6 (6.5) 14 (15.2) 13 (14.1) 9 (9.8)                        | SBP4 Rap1a groEL 16S rRNA                    | <i>B. bovis</i> <i>B. bigemina</i> <i>A. marginale</i> <i>Anaplasma</i> sp. ( <i>A. platys</i> -like) Mixed <i>Anaplasma</i>       | nPCR nPCR nPCR nPCR      | 4 3 4 6 | MN870658-MN870661 MN870655-MN870657 MN870643-MN870646 MN861059-MN861064  |

|                           |                                                                     |           |               |     |                                                                                                                           |                                                                                                                                                |                                                                                                                                                                                                                                                                                                              |                                                                                              |        |                                                                                                                                                         |
|---------------------------|---------------------------------------------------------------------|-----------|---------------|-----|---------------------------------------------------------------------------------------------------------------------------|------------------------------------------------------------------------------------------------------------------------------------------------|--------------------------------------------------------------------------------------------------------------------------------------------------------------------------------------------------------------------------------------------------------------------------------------------------------------|----------------------------------------------------------------------------------------------|--------|---------------------------------------------------------------------------------------------------------------------------------------------------------|
|                           |                                                                     | buffaloes |               | 86  | 0 (0)<br>1(1.2)<br>0 (0.0)<br>1(1.2)<br>0 (0)                                                                             | 18S rRNA<br>SBP4<br>Rap1a<br>groEL<br>18S rRNA                                                                                                 | <i>Theileria sp.</i><br><i>B. bovis</i><br><i>B. bigemina</i><br><i>A. marginale</i><br><i>Theileria sp.</i>                                                                                                                                                                                                 | nPCR<br>nPCR<br>nPCR<br>nPCR<br>nPCR                                                         | 1      | MN870645                                                                                                                                                |
| Parvizi et al.,<br>2020a  | variable                                                            | cattle    | 2015-<br>2016 | 758 | 40 (5.3)                                                                                                                  | -                                                                                                                                              | <i>Anaplasma/Ehrlichia</i><br><i>A. marginale</i>                                                                                                                                                                                                                                                            | qPCR                                                                                         | -      | -                                                                                                                                                       |
| Yousef et al.,<br>2020    | Sharkia                                                             | cattle    | 2019          | 25# | 25                                                                                                                        | Tams1                                                                                                                                          | <i>T. annulata</i>                                                                                                                                                                                                                                                                                           | cPCR                                                                                         | -      | -                                                                                                                                                       |
| Abdullah et al.,<br>2021a | variable                                                            | cattle    | 2019-<br>2020 | 112 | 6 (5.36)<br>1 (0.89)<br>0 (0)                                                                                             | ITS<br>16S rRNA<br>gltA                                                                                                                        | <i>Bartonella sp.</i><br><i>Borrelia theileri</i><br><i>Rickettsiae</i>                                                                                                                                                                                                                                      | cPCR                                                                                         | 1<br>1 | MW596416<br>MW562684                                                                                                                                    |
|                           |                                                                     | buffaloes |               | 26  | 3 (11.54)<br>0 (0.0)<br>0 (0)                                                                                             | ITS<br>16S rRNA<br>gltA                                                                                                                        | <i>Bartonella sp.</i><br><i>Borrelia theileri</i><br><i>Rickettsiae</i>                                                                                                                                                                                                                                      |                                                                                              | 1      | MW596417                                                                                                                                                |
| Abdullah et al.,<br>2021b | Beni-Suef,<br>Qalyubia,<br>El-Wady<br>El-Geded,<br>Qena,<br>Beheira | cattle    | 2016-<br>2018 | 88  | 15 (17)<br>14 (15.9)<br>1 (1.1)<br>25 (28.4)<br>18 (20.4)<br>1 (1.1)<br>3 (3.4)<br>3 (3.4)<br>3 (3.4)<br>0<br>0<br>0<br>0 | 5.8S rRNA<br>18S rRNA<br>18S rRNA<br>23S rRNA<br>Ana-rpoB<br>Ana-rpoB<br>Ana-rpoB<br>Ana-rpoB<br>16S rRNA<br>16S RNA<br>gltA<br>IS1111<br>ITS3 | <i>Piroplasmida</i><br><i>T. annulata</i><br><i>Ba. bigemina</i><br><i>Anaplasmataceae</i><br><i>An. marginale</i><br><i>An. centrale</i><br><i>An. ovis</i><br><i>An. platys-like</i><br><i>Borrelia sp.</i><br><i>Bo. theileri</i><br><i>Rickettsia sp.</i><br><i>C. burnettii</i><br><i>Bartonella sp</i> | qPCR<br>nPCR<br>nPCR<br>qPCR<br>cPCR<br>cPCR<br>cPCR<br>cPCR<br>qPCR<br>cPCR<br>qPCR<br>qPCR |        | MN625888 and MN625889<br>MN625890<br><br>MN625935, MN626393, MN624134<br>MN626394<br>MN625933, MN624133<br>MN626397, MN626400, MN624137<br><br>MN621893 |
|                           |                                                                     | buffaloes |               | 26  | 2 (7.7)<br>2 (7.7)<br>2 (7.7)<br>2 (7.7)<br>0<br>0<br>0                                                                   | 5.8S rRNA<br>18S rRNA<br>23S rRNA<br>Ana-rpoB<br>gltA<br>IS1111<br>ITS3                                                                        | <i>Piroplasmida</i><br><i>T. ovis</i><br><i>Anaplasmataceae</i><br><i>An. platys-like</i><br><i>Rickettsia sp.</i><br><i>C. burnettii</i><br><i>Bartonella sp</i>                                                                                                                                            | qPCR<br>cPCR<br>qPCR<br>cPCR<br>qPCR<br>qPCR<br>qPCR                                         |        | MN625887<br><br>MN626399, MN624139                                                                                                                      |
| AL-Hosary et<br>al. 2021b | Faiyum,<br>Assiut and<br>Kharja                                     | cattle    | 2018          | 41  | 39<br>38<br>2                                                                                                             | 18S rRNA<br>16S rRNA<br>18S rRNA                                                                                                               | <i>T. annulata</i><br><i>An. marginale</i><br><i>B. bovis</i>                                                                                                                                                                                                                                                | RLB,<br>cPCR                                                                                 |        | MN223728:MN223732<br>MN370071:MN370075                                                                                                                  |

|                         |                                                        |                  |           |       |                                   |                            |                                                              |      |            |                          |
|-------------------------|--------------------------------------------------------|------------------|-----------|-------|-----------------------------------|----------------------------|--------------------------------------------------------------|------|------------|--------------------------|
|                         |                                                        |                  |           |       | 2                                 | 18S rRNA                   | <i>B. bigemina</i>                                           |      |            | MN227677 and MN227679    |
|                         |                                                        |                  |           |       | 1                                 | 18S rRNA                   | <i>B. occultans</i>                                          |      |            |                          |
| El Damaty et al., 2021¥ | El-Sharkia                                             | cattle buffaloes | 2019-2020 | 48/22 | 24/9                              | Tams-1, 18s rRNA           | <i>T. annulata</i>                                           | cPCR | -          | -                        |
| Selim et al., 2021a     | Kafr El-Sheikh, Menofia, and Al-Gharbia                | cattle           | 2020      | 130*  | 130 (100)<br>0<br>0               | MSP4                       | <i>A. marginale</i><br><i>A. centrale</i><br><i>A. bovis</i> | cPCR | 2          | MZ695054 and MZ695055    |
| Barghash, 2022          | Sinai                                                  | cattle           | 2020-2021 | 74    | 18 (24.32)<br>0 (0)<br>30 (40.54) | BbSBP-4<br>RAP-1a<br>tams1 | <i>B. bovis</i><br><i>B. bigemina</i><br><i>T. annulata</i>  | cPCR | 1<br><br>1 | MZ197893<br><br>MZ197896 |
| Selim et al., 2022b     | Gharbia, Beheira, Kafr ElSheikh, Menofia               | cattle           | 2020      | 500   | 44 (8.8)                          | MPSP                       | <i>T. orientalis</i>                                         | cPCR | 3          | LC661355-LC661357        |
| Selim et al., 2022c     | Alexandria, Beheira, Kafr El Sheikh, Qalyubia, Menofia | cattle           | 2019-2020 | 570   | 94 (16.49)                        | Tams-1                     | <i>T. annulata</i>                                           | cPCR | 2          | LC549653 and LC549654    |

\*Seropositive samples

#Positive by microscopy

@Infections were detected using qPCR for *A. marginale* and PCR-RLB followed by sequencing for all detected pathogens as well as conventional and semi-nested PCRs/sequencing for confirmations of genotyping results.

¥ Studies not included in Meta-analysis.

**Abbreviations:** **AMA-1**; Apical Membrane Antigen-1, **BbSBP-4**; *B. bovis* Rhoptry Associated Protein-4, **cytb**; Cytochrome b, **gltA**; Citrate synthase, **groEL**; 'heatshock operon', **hspB**; Heat shock protein antigenic polypeptide, **IS1111**; *C. burnetii* transposon-like sequence, **ompA**; Outer membrane protein A, **MPSP**; Major Piroplasm Surface Protein gene, **mSP1b**; major surface protein-1b gene, **ospA**; Outer surface protein A. gene, **RAP-1**; Rhoptry Associated Protein-1, **RRA**; Rhoptry associated protein related antigen, **SSrRNA**; small subunit ribosomal RNA gene, **Tams-1**; *Theileria annulata* 30 KDa major merozoite surface antigen-1 gene

**Supplementary Table S2:** Study characteristics of tick-borne pathogens molecular surveys in sheep and goats from Egypt.

| Reference                   | Region                                    | Host           | Study Year    | Sample size   | No. positive (%)                      | Marker                        | Species                                                                                                                                   | Molecular tools     | Sequenced isolates | Accession numbers                                                 |
|-----------------------------|-------------------------------------------|----------------|---------------|---------------|---------------------------------------|-------------------------------|-------------------------------------------------------------------------------------------------------------------------------------------|---------------------|--------------------|-------------------------------------------------------------------|
| Elsify et al., 2015         | Menoufia, Behera, Giza                    | sheep          | 2013          | 105           | 1 (0.95)<br>2 (1.90)                  | RAP-1<br>AMA-1                | <i>B. bovis</i><br><i>B. bigemina</i>                                                                                                     | nPCR<br>cPCR        | 1<br>2             | AB917259<br>AB917260-AB917262                                     |
| Khalifa et al., 2016        | Qaluobia                                  | sheep<br>goats | 2014-<br>2015 | 23*<br>27*    | 21 (91.3)<br>23 (85.2)                | IS1111                        | <i>C. burnetii</i>                                                                                                                        | trans-PCR           | -                  | -                                                                 |
| Abdel-Moein and Hamza, 2017 | Giza                                      | goats<br>sheep | NS            | 29#<br>27     | 1 (3.4)<br>0                          | IS1111                        | <i>C. burnetii</i>                                                                                                                        | nPCR                | 1                  | KU977532                                                          |
| Abdel-Baky and Allam, 2018  | Variable                                  | sheep          | 2014-<br>2016 | 120           | 41 (31.78)<br>12<br>2<br>5<br>2<br>20 | 16S rRNA<br>msp4 and<br>hsp60 | <i>Anaplasmataceae</i><br><i>A. phagocytophilum</i><br><i>A. marginale</i><br><i>A. ovis</i><br><i>A. platys</i><br><i>Anaplasma spp.</i> | cPCR                | -                  | Sequencing performed but, no GeneBank submitted accession numbers |
| Allam et al., 2018          | Variable                                  | sheep          | 2014-<br>2016 | 110           | 30 (29.41)                            | 16S rDNA,<br>OmpA and<br>gltA | <i>Rickettsiae</i>                                                                                                                        | cPCR                | -                  | Sequencing performed but, no GeneBank submitted accession numbers |
| Selim et al., 2018          | Menoufia, Qalubia, Alexandria and Gharbia | sheep<br>goats | 2015–<br>2016 | 110<br>80     | 37 (33.6)<br>13 (16.3)                | icd                           | <i>C. burnetii</i>                                                                                                                        | qPCR                | -                  | -                                                                 |
| Selim et al., 2019          | Alexandria                                | sheep          | NS            | 21®<br>6<br>3 | 21<br>6<br>3                          | IS1111<br>-<br>-              | <i>C. burnetii</i>                                                                                                                        | qPCR<br>MLVA<br>MST | -                  | -                                                                 |
| Abbass et al., 2020         | Assiut                                    | sheep<br>goats | 2016-<br>2017 | 30*<br>18*    | 14 (46.7)<br>8 (44.4)                 | IS1111                        | <i>C. burnetii</i>                                                                                                                        | RT-qPCR             | -                  | -                                                                 |
| Abdel-Baky et al., 2020¥    | NS                                        | sheep          | 2014-<br>2016 | 120           | 37.04%                                | OspA and<br>flaB              | <i>B. burgdorferi</i>                                                                                                                     | nPCR                | -                  | -                                                                 |
| Tumwebaze et al., 2020      | Menoufia                                  | sheep          | 2017          | 66            | 0 (0)<br>6 (9.1)                      | ssu rRNA<br>msp4              | <i>B. ovis</i><br><i>A. ovis</i>                                                                                                          | cPCR<br>cPCR        | 4                  | MN882167- MN882170                                                |
| Abdullah et al., 2021a      | variable                                  | sheep<br>goats | 2019-<br>2020 | 38<br>28      | 3 (7.89)<br>1 (3.57)                  | ITS                           | <i>Bartonella sp.</i>                                                                                                                     | cPCR                | -                  | -                                                                 |

|                         |                                             |       |           |       |           |                          |                          |      |                       |                      |
|-------------------------|---------------------------------------------|-------|-----------|-------|-----------|--------------------------|--------------------------|------|-----------------------|----------------------|
| Abdullah et al., 2021b  | Giza, Beni-Suef, Qalyubia, Sinai            | sheep | 2016-2018 | 58    | 5 (8.6)   | 5.8S rRNA                | <i>Piroplasmida</i>      | qPCR | MN625886              |                      |
|                         |                                             |       |           |       | 5 (8.6)   | 18S rRNA                 | <i>T. ovis</i>           | nPCR |                       |                      |
|                         |                                             |       |           |       | 4 (6.9)   | 23S rRNA                 | <i>Anaplasmataceae</i>   | qPCR |                       |                      |
|                         |                                             |       |           |       | 2 (3.4)   | Ana-rpoB                 | <i>An. marginale</i>     | cPCR |                       |                      |
|                         |                                             |       |           |       | 1 (1.7)   | Ana-rpoB                 | <i>An. ovis</i>          | cPCR |                       |                      |
|                         |                                             |       |           |       | 1 (1.7)   | Ana-rpoB                 | <i>An. platys-like</i>   | cPCR |                       |                      |
|                         |                                             |       |           |       | 2 (3.4)   | 16S rRNA                 | <i>Borrelia sp.</i>      | qPCR |                       |                      |
|                         |                                             |       |           |       | 2 (3.4)   | 16S rRNA                 | <i>Bo. Theileri</i>      | cPCR |                       |                      |
|                         |                                             |       |           |       | 1 (1.7)   | IS1111                   | <i>Coxiella burnetii</i> | qPCR |                       |                      |
|                         |                                             |       |           |       | 0         | gltA                     | <i>Rickettsia sp.</i>    | qPCR |                       |                      |
|                         |                                             |       |           |       | 0         | ITS3                     | <i>Bartonella sp</i>     | qPCR |                       |                      |
|                         |                                             | goats | 33        | 1 (3) | IS1111    | <i>Coxiella burnetii</i> | qPCR                     |      |                       |                      |
|                         |                                             |       |           | 0     | 5.8S rRNA | <i>Piroplasmida</i>      | qPCR                     |      |                       |                      |
|                         |                                             |       |           | 0     | 23S rRNA  | <i>Anaplasmataceae</i>   | qPCR                     |      |                       |                      |
|                         |                                             |       |           | 0     | 16S rRNA  | <i>Borrelia sp.</i>      | qPCR                     |      |                       |                      |
|                         |                                             |       |           | 0     | gltA      | <i>Rickettsia sp.</i>    | qPCR                     |      |                       |                      |
|                         |                                             |       |           | 0     | ITS3      | <i>Bartonella sp</i>     | qPCR                     |      |                       |                      |
|                         |                                             |       |           |       |           |                          |                          |      |                       |                      |
| Al-Hosary et al., 2021a | Menoufia, Beheira, El-Wady El-Geded         | sheep | 2014      | 115   | 6 (5.22)  | 18S rRNA                 | <i>Theileria sp.</i>     |      | AB986193 and AB986194 |                      |
|                         |                                             |       |           |       | 5 (4.37)  |                          | <i>T. ovis</i>           | cPCR | 5                     | KY494648- KY494650   |
|                         |                                             |       |           |       | 1 (0.87)  |                          | <i>T. lestoquardi</i>    | nPCR | 1                     | KY494651             |
| Barghash, 2022          | Sinai                                       | sheep | 2020-2021 | 108   | 11(10.19) | BbSBP-4                  | <i>B. bovis</i>          | cPCR | 1                     | MZ197895             |
|                         |                                             |       |           |       | 22(20.37) | tams1                    | <i>T. annulata</i>       |      | 1                     | MZ197898             |
|                         |                                             | goats |           | 48    | 8(16.67)  | BbSBP-4                  | <i>B. bovis</i>          |      | 1                     | MZ197894             |
|                         |                                             |       |           |       | 24(50.00) | tams1                    | <i>T. annulata</i>       |      | 1                     | MZ197897             |
| Ben Said et al., 2022   | Gharbia, Kafr Elsheikh, Menofia, Alexandria | sheep | 2020      | 355   | 55 (15.5) | msp4                     | <i>A. ovis</i>           | cPCR | 4                     | OL859531 to OL859534 |

\*Seropositive samples

# placental cotyledons and vaginal discharges were examined from aborted animals.

@Vaginal swabs from aborted sheep

¥ Studies not included in Meta-analysis.

**Abbreviations:** **ama-1**; Apical membrane antigen 1 genes, **Ana-rpoB**; Anaplasma gene encoding the  $\beta$ -subunit of RNA polymerase, **BbSBP-4**; B. bovis Rhoptry Associated Protein-4; **IS1111**; C. burnetii transposon-like sequence, **mSP4**; Merozoite surface protein 4, **icd**; iso citrate dehydrogenase gene, **MST**; Multi-spacer sequence typing, **MLVA**, Multiple-locus variable-number tandem repeat analysis, **rap-1**; Rhoptry-associated protein 1 gene, **SSU rRNA**; small subunit ribosomal RNA.

**Supplementary Table S3:** Study characteristics of tick-borne pathogens molecular surveys in equines from Egypt.

| Reference              | Region                                                                                | Host                       | Study Year    | Sample size   | No. positive (%)                                                                               | Marker                           | Species                                                                                                                                                                | Molecular tools                              | Sequenced isolates         | Accession numbers                                                                                                         |
|------------------------|---------------------------------------------------------------------------------------|----------------------------|---------------|---------------|------------------------------------------------------------------------------------------------|----------------------------------|------------------------------------------------------------------------------------------------------------------------------------------------------------------------|----------------------------------------------|----------------------------|---------------------------------------------------------------------------------------------------------------------------|
| Mahdy et al., 2016     | Giza and Cairo                                                                        | horses<br>donkeys          | NS            | 168<br>133    | 104 (61.9)<br>67 (50.4)                                                                        | EMA-1                            | <i>T. equi</i>                                                                                                                                                         | nPCR                                         | 1                          | KX262963                                                                                                                  |
| Mahmoud et al., 2016   | Giza                                                                                  | horses<br>donkeys          | NS            | 88<br>51      | 32 (36.4)<br>17 (19.3)<br>22 (43.1)<br>8 (15.7)                                                | ema-1<br>rap-1<br>ema-1<br>rap-1 | <i>T. equi</i><br><i>B. caballi</i><br><i>T. equi</i><br><i>B. caballi</i>                                                                                             | nPCR                                         | 3                          | KR811095- KR811097                                                                                                        |
| Kuraa and Nageib, 2017 | Assiut                                                                                | donkeys                    | NS            | 50            | 19 (38)                                                                                        | B1                               | <i>T. equi</i>                                                                                                                                                         | cPCR                                         | -                          | -                                                                                                                         |
| El-Seify et al., 2018  | Giza and Cairo                                                                        | horses<br>donkeys<br>mules | 2015-<br>2016 | 45<br>50<br>5 | 11 (24.4)<br>18 (36)<br>1 (20)                                                                 | 18S rRNA                         | <i>T. equi</i>                                                                                                                                                         | cPCR                                         | 1<br>1<br>1                | MF192854<br>MF192856<br>MF192855                                                                                          |
| El-Sayed et al., 2020  | Menoufia,<br>Mersa<br>Matruh, Giza                                                    | donkeys                    | 2017          | 149           | 9 (6.04)                                                                                       | EMA-1                            | <i>T. equi</i>                                                                                                                                                         | nPCR                                         | 1                          | LC269846                                                                                                                  |
| Al-Araby et al., 2021  | Dakahlia                                                                              | horses                     | NS            | 147           | 14 (9.52)                                                                                      | EMA-1                            | <i>T. equi</i>                                                                                                                                                         | nPCR                                         | -                          | -                                                                                                                         |
| Abdullah et al., 2021a | variable                                                                              | horses<br>donkeys          | 2019-<br>2020 | 8<br>22       | 1 (12.5)<br>2 (9.09)                                                                           | ITS                              | <i>Bartonella sp.</i>                                                                                                                                                  | cPCR                                         | -                          | -                                                                                                                         |
| Elsawy et al., 2021    | Cairo, Giza,<br>Almonofia,<br>Al fayoum,<br>Beni Suef,<br>Ismailia, and<br>Alexandria | horses<br>donkeys          | NS            | 79<br>76      | 16 (20.3)<br>1 (1.2)<br>42 (53.1)<br>3 (4.5)<br>10 (13.1)<br>0 (0.0)<br>29 (38.1)<br>18 (26.8) | 18S rRNA                         | <i>T. equi</i><br><i>B. caballi</i><br><i>T. haneyi</i><br>Mixed <i>Theleiria</i><br><i>T. equi</i><br><i>B. caballi</i><br><i>T. haneyi</i><br>Mixed <i>Theleiria</i> | mPCR<br>mPCR<br>cPCR<br>mPCR<br>mPCR<br>cPCR | 5<br>1<br>2<br>4<br>1<br>3 | MW659071- MW659075<br>MW678758<br>MW591694, MW591695<br>MW659076 -MW659079<br>MW678759<br>MW591692, MW591693,<br>MW591697 |

|                          |                     |         |      |     |          |           |                       |      |   |                       |
|--------------------------|---------------------|---------|------|-----|----------|-----------|-----------------------|------|---|-----------------------|
| Abdullah et al.,<br>2022 | Cairo, Beni<br>Suef | horses  | 2009 | 320 | 13 (4.1) | 5.8S rRNA | Piroplasmida          | qPCR |   |                       |
|                          |                     |         |      |     | 4 (1.3)  | 18S rRNA  | <i>Th. equi</i>       | nPCR | 2 | MN625897 and MN625898 |
|                          |                     |         |      |     | 9 (2.8)  | 18S rRNA  | <i>Th. sp. Africa</i> | nPCR | 4 | MN625900- MN625903    |
|                          |                     |         |      |     | 0        | gltA      | Rickettsia sp.        | qPCR |   |                       |
|                          |                     |         |      |     | 0        | 16S rRNA  | Borrelia sp.          | qPCR |   |                       |
|                          |                     |         |      |     | 0        | IS1111    | <i>C. burnetii</i>    | qPCR |   |                       |
|                          |                     |         |      |     | 0        | ITS3      | Bartonella sp.        | qPCR |   |                       |
|                          |                     |         |      |     | 4 (26.6) | 23S rRNA  | Anaplasmataceae       | qPCR |   |                       |
|                          |                     | donkeys |      | 15  | 2 (13.3) | 23S rRNA  | <i>A. marginale</i>   | cPCR | 1 | MN614103              |
|                          |                     |         |      |     | 2 (13.3) | 23S rRNA  | <i>A. ovis</i>        | cPCR | 1 | MN614104              |
|                          |                     |         |      |     | 2 (13.3) | 5.8S rRNA | Piroplasmida          | qPCR |   |                       |
|                          |                     |         |      |     | 2 (13.3) | 18S rRNA  | <i>Th. ovis</i>       | nPCR | 2 | MN625886 and MN625887 |
|                          |                     |         |      |     | 0        | gltA      | Rickettsia sp.        | qPCR |   |                       |
|                          |                     |         |      |     | 0        | 16S rRNA  | Borrelia sp.          | qPCR |   |                       |
|                          |                     |         |      |     | 0        | IS1111    | <i>C. burnetii</i>    | qPCR |   |                       |
|                          |                     |         |      |     | 0        | ITS3      | Bartonella sp.        | qPCR |   |                       |

**Abbreviations:** EMA-1; T. equi merozoite antigen-1, **gltA**; Citrate synthase, **IS1111**; C. burnetii transposon-like sequence, **rap-1**; Rhoptry-associated protein 1 gene

**Supplementary Table S4:** Study characteristics of tick-borne pathogens molecular surveys in dromedary camels (*Camelus dromedarius*) from Egypt.

| Reference            | Region | Study Year | Sample size | No. positive (%)   | Marker             | Species                                     | Molecular tools | Sequenced isolates | Accession numbers |
|----------------------|--------|------------|-------------|--------------------|--------------------|---------------------------------------------|-----------------|--------------------|-------------------|
| Youssef et al., 2015 | Giza   | 2009       | 30          | 21 (70)<br>18 (60) | SSU rRNA<br>30-KDa | <i>Theileria spp.</i><br><i>T. annulate</i> | cPCR            | -                  | -                 |

|                                 |                        |           |     |                                                                                                  |                                                                                                 |                                                                                                                                                                                                                     |                                                                      |   |                                                                   |
|---------------------------------|------------------------|-----------|-----|--------------------------------------------------------------------------------------------------|-------------------------------------------------------------------------------------------------|---------------------------------------------------------------------------------------------------------------------------------------------------------------------------------------------------------------------|----------------------------------------------------------------------|---|-------------------------------------------------------------------|
|                                 |                        |           |     | 3 (10)                                                                                           |                                                                                                 | <i>Theileria spp.</i>                                                                                                                                                                                               |                                                                      |   |                                                                   |
| Abou El-Naga and Barghash, 2016 | Matrouh                | 2012-2015 | 331 | 223 (67.37)<br>223 (67.37)<br>172 (51.96)<br>238 (71.9)<br>61 (18.43)<br>36 (10.87)<br>25 (7.55) | msp1β<br>-<br>SSU rRNA<br>CPS II<br>SSU rRNA                                                    | <i>Anaplasma sp.</i><br><i>A. marginale</i><br><i>A. centrale</i><br><i>Th. Camelensis</i><br><i>Babesia sp.</i><br><i>B. bovis</i><br><i>B. bigemina</i>                                                           | cPCR                                                                 | - | -                                                                 |
| Abdullah et al., 2018           | Cairo, Giza, and Sinai | 2017      | 113 | 52 (46)                                                                                          | IS30A                                                                                           | <i>C. burnetii</i>                                                                                                                                                                                                  | cPCR                                                                 | - | -                                                                 |
| Abd El-Baky and Allam, 2018     | Variable               | 2014-2016 | 110 | 65 (50.39)<br>20<br>10<br>6<br>5<br>6<br>5<br>13                                                 | 16S rRNA<br>msp4 and hsp60                                                                      | <i>Anaplasmataceae</i><br><i>A. phagocytophilum</i><br><i>A. marginale</i><br><i>A. ovis</i><br><i>A. bovis</i><br><i>A. centrale</i><br><i>A. platys</i><br><i>Anaplasma spp.</i>                                  | cPCR                                                                 | - | Sequencing performed but, no GeneBank submitted accession numbers |
| Allam et al., 2018              | Variable               | 2014-2016 | 120 | 66 (64.71)                                                                                       | 16S rDNA, OmpA and gltA                                                                         | <i>Rickettsiae</i>                                                                                                                                                                                                  | cPCR                                                                 | - | Sequencing performed but, no GeneBank submitted accession numbers |
| Abdullah et al., 2019a          | Giza and Cairo         | NS        | 112 | 19 (16.9)                                                                                        | IS1111                                                                                          | <i>C. burnetii</i>                                                                                                                                                                                                  | qPCR                                                                 | - | -                                                                 |
| Abdullah et al., 2019b          | Cairo, Giza and Sinai  | 2013-2014 | 61  | 25 (41)                                                                                          | OmpA and gltA                                                                                   | <i>Rickettsiae</i><br><i>R. africae</i>                                                                                                                                                                             | cPCR                                                                 |   | U83436.2                                                          |
| Abdel-Baky et al., 2020         | NS                     | 2014-2016 | 110 | 40.74%                                                                                           | OspA and flaB                                                                                   | <i>B. burgdorferi</i>                                                                                                                                                                                               | nPCR                                                                 | - | -                                                                 |
| Abdullah et al., 2021b          | Cairo, Giza, Sinai     | 2016-2018 | 149 | 10 (6.7)<br>1 (0.7)<br>1 (0.7)<br>8 (5.4)<br>0<br>0<br>0<br>0<br>0                               | 23S rRNA<br>Ana-rpoB<br>Ana-rpoB<br>Ana-rpoB<br>5.8S rRNA<br>16S rRNA<br>gltA<br>IS1111<br>ITS3 | <i>Anaplasmataceae</i><br><i>An. marginale</i><br><i>An. platys</i><br><i>An. platys-like</i><br><i>Piroplasmida</i><br><i>Borrelia sp.</i><br><i>Rickettsia sp.</i><br><i>C. burnetii</i><br><i>Bartonella sp.</i> | qPCR<br>cPCR<br>cPCR<br>cPCR<br>qPCR<br>qPCR<br>qPCR<br>qPCR<br>qPCR |   | MN625938<br>MN625937<br>MN626396, MN626401                        |

|                      |             |      |     |            |          |                        |      |           |                    |
|----------------------|-------------|------|-----|------------|----------|------------------------|------|-----------|--------------------|
| El-Sayed et al. 2021 | Halayeb and | 2017 | 142 | 4 (2.81)   | RAP-1    | <i>B. bovis</i>        | nPCR | 1         | MF737083           |
| Rizk et al., 2021    | Shalateen   |      |     | 17 (11.97) | SSU rRNA | <i>Babesia microti</i> | nPCR | 1         | MF737082           |
| Mohamed et al., 2021 | Abu Simbel  | NS   | 100 | 29 (29)    | 16S rDNA | <i>Anaplasmataceae</i> | cPCR | <b>28</b> | LC592622-LC592650  |
|                      |             |      |     |            | groEL    | <i>Ca. An. camelii</i> |      | <b>10</b> | LC592667- LC592677 |
|                      |             |      |     |            | gltA     |                        |      | <b>10</b> | LC592678-LC592688  |

**Abbreviations:** **Ana-rpoB**; Anaplasma gene encoding the  $\beta$ -subunit of RNA polymerase, **CPS II**; gene encoding the enzyme carbamoyl phosphate synthetase II, **gltA**; Citrate synthase, **groEL**; ‘heatshock operon’ **IS1111**; *C. burnetii* transposon-like sequence, **msp1 $\beta$** ; Major surface protein–1 $\beta$  encoding gene, **msp4**; Merozoite surface protein 4, **ompA**; Outer membrane protein A, **rap-1**; Rhoptry-associated protein 1 gene, **SSU rRNA**; small subunit ribosomal RNA.

‡ Studies not included in Meta-analysis

**Supplementary Table S5:** Study characteristics of tick-borne pathogens molecular surveys in dogs from Egypt.

| Reference              | Region               | Study Year | Sample size | No. positive (%)   | Marker                | Species                                 | Molecular tools | Sequenced isolates | Accession numbers |
|------------------------|----------------------|------------|-------------|--------------------|-----------------------|-----------------------------------------|-----------------|--------------------|-------------------|
| Elhelw et al., 2014    | NS                   | 2008-2009  | 26          | 6 (23)             | OspA                  | <i>B. burgdorferi</i>                   | cPCR            | 1                  | KC522030          |
| Salem and Farag, 2014  | Giza                 | 2011-2012  | 13*         | 13                 | 18S rRNA              | <i>B. vogeli</i>                        | nPCR            | -                  | -                 |
| El-Neshwy et al., 2020 | Sharkia and Dakahlia | 2018-2019  | 75          | 14 (18.67)         | 18s rRNA              | <i>B. vogeli</i>                        | nPCR            | -                  | -                 |
| Abdullah et al., 2021b | Cairo                | 2016-2018  | 203         | 1 (0.5)<br>1 (0.5) | 5.8S rRNA<br>18S rRNA | <i>Piroplasmida</i><br><i>Ba. canis</i> | qPCR<br>nPCR    |                    | MN625891          |

|                                     |                                                            |               |     |            |          |                                |      |   |                              |
|-------------------------------------|------------------------------------------------------------|---------------|-----|------------|----------|--------------------------------|------|---|------------------------------|
|                                     |                                                            |               |     | 7 (3.4)    | 23S rRNA | <i>Anaplasmataceae</i>         | qPCR |   |                              |
|                                     |                                                            |               |     | 7 (3.4)    | Ana-rpoB | <i>An. platys</i>              | cPCR |   | MN625936, MN626395, MN624140 |
|                                     |                                                            |               |     | 3 (1.5)    | gltA     | <i>Rickettsia sp.</i>          | qPCR |   |                              |
|                                     |                                                            |               |     | 3 (1.5)    | OmpB     | <i>Rickettsia africae-like</i> | nPCR |   | MN629892, MN629893           |
|                                     |                                                            |               |     | 0          | IS1111   | <i>C. burnettii</i>            | qPCR |   |                              |
|                                     |                                                            |               |     | 0          | ITS3     | <i>Bartonella sp</i>           | qPCR |   |                              |
|                                     |                                                            |               |     | 0          | 16S rRNA | <i>Borrelia sp.</i>            | qPCR |   |                              |
| Elhelw et al., 2021                 | Giza<br>Cairo                                              | 2017          | 100 | 1 (1.67)   | 16S rRNA | <i>B. burgdorferi</i>          | cPCR | 1 | MH685928                     |
| El-Dakhly et al., 2021 <sup>‡</sup> | Alexandria                                                 | NS            | 70  | 14 (20)    | 16sRNA   | <i>Anaplasma/Ehrlichia</i>     | cPCR | - | -                            |
| Selim et al., 2021b                 | Cairo, Giza,<br>Qalyubia,<br>Gharbia and<br>Kafr El Sheikh | 2019-<br>2020 | 500 | 32 (6.4)   | 16S rRNA | <i>A. platys</i>               | cPCR | 1 | LC632659                     |
| Selim et al., 2021c                 | Cairo, Giza, and<br>Qalyubia                               | NS            | 400 | 39 (9.7)   | 16S rRNA | <i>E. canis</i>                | cPCR | 1 | LC490598                     |
| Zaki et al., 2021                   | Cairo                                                      | 2017-<br>2019 | 242 | 62 (25.62) | 18S rRNA | <i>B. vogeli</i>               | cPCR | 1 | MT565474                     |
| Izenour et al., 2022                | Cairo                                                      | 2019          | 116 | 1          | groEL    | <i>Anaplasma sp.</i>           | cPCR | 1 | MW557303                     |
|                                     |                                                            |               |     | 1          | 18S rRNA | <i>Babesia sp.</i>             |      | 1 | MW556745                     |
|                                     |                                                            |               |     | 2          | 16S rRNA | <i>Ehrlichia sp.</i>           |      |   |                              |
|                                     |                                                            |               |     | 1          | 16S rRNA | <i>Borrelia sp.</i>            |      |   |                              |
|                                     |                                                            |               |     | 0          | ssrA     | <i>Bartonella sp.</i>          |      |   |                              |
| Selim et al., 2022a                 | Giza, Kafr El<br>Sheikh,<br>Qalyubia<br>and Gharbia        | 2019          | 275 | 14 (5.1)   | 18S rRNA | <i>B. vogeli</i>               | cPCR | 1 | LC651125                     |

\*Samples from dogs with clinical signs of babesiosis and also were positive by microscopy.

<sup>‡</sup> Studies not included in Meta-analysis

**Abbreviations:** **Ana-rpoB**; Anaplasma gene encoding the  $\beta$ -subunit of RNA polymerase, **gltA**; Citrate synthase, **groEL**; ‘heatshock operon’ **ompB**; Outer membrane protein B, **ospA**; Outer surface protein A. gene.

**Supplementary Table S6:** Study characteristics of molecular surveys of pathogens in ticks infesting livestock animals from Egypt.

| Reference #                         | Host                           | No. infested (%)          | Tick species (N.) ®                                                                                                                                                                                                                       | Pathogens                                                                                                | Marker                        | No. positive (%)                                                                                                                                                                                                                  |
|-------------------------------------|--------------------------------|---------------------------|-------------------------------------------------------------------------------------------------------------------------------------------------------------------------------------------------------------------------------------------|----------------------------------------------------------------------------------------------------------|-------------------------------|-----------------------------------------------------------------------------------------------------------------------------------------------------------------------------------------------------------------------------------|
| Adham et al., 2009 <sup>1</sup>     | NS                             | -                         | Boophilus annulatus                                                                                                                                                                                                                       | <i>B. bovis</i><br><i>B. bigemina</i>                                                                    | SSrRNA                        | 55/100 (55)<br>66/100 (66)                                                                                                                                                                                                        |
| Adham et al., 2010 <sup>1</sup>     | NS                             | -                         | B. annulatus<br>H. dromedarii<br>H. excavatum<br>R. sanguineus<br>A. lepidum<br>O. savignyi                                                                                                                                               | <i>B. burgdorferi</i>                                                                                    | OspC                          | 4/50 (8)<br>7/28 (25)<br>12/24 (50)<br>2/23 (8)<br>4/14 (28)<br>31/47 (66)                                                                                                                                                        |
| Allam et al., 2018 <sup>1</sup>     | Camels<br>Cattle<br>Sheep      | 33.62%<br>59.03%<br>7.35% | A. gemma<br>A. lepidum<br>A. variegatum<br>B. annulatus<br>H. albiparmatum<br>H. a. excavatum<br>H. dromedarii<br>H. impeltatum<br>H. m. rufipes<br>H. m. marginatum<br>H. truncatum<br>Rh. humeralis<br>Rh. pulchellus<br>Rh. sanguineus | <i>Rickettsiae</i> sp.<br>R. aeschlimannii-like<br>R. africae-like<br>R. sibirica<br>mongolitimonae-like | 16S rDNA,<br>OmpA and<br>gltA | 15/51 (4.78)<br>20/67 (6.37)<br>5/55 (1.59)<br>5/2922 (1.59)<br>6/25 (1.91)<br>24/127 (7.64)<br>112/1288 (35.67)<br>24/91 (7.64)<br>24/53 (7.64)<br>24/105 (7.64)<br>16/90 (5.10)<br>8/20 (2.55)<br>12/22 (3.82)<br>19/307 (6.05) |
| Chisholm et al., 2012 <sup>1¶</sup> | Cattle, buffalo, sheep, camels | NS                        | Hyalomma (138 pools)<br>H. excavatum<br>H. dromedarii                                                                                                                                                                                     | CCHFV                                                                                                    | RT-PCR-S segment              | 6/138 (4.34)<br>1<br>5                                                                                                                                                                                                            |
| Elhelw et al., 2014                 | cattle                         | NS                        | H. anatolicum<br>excavatum                                                                                                                                                                                                                | <i>B. burgdorferi</i>                                                                                    | OspA                          | 3/14 (21.4)                                                                                                                                                                                                                       |
| ELHariri et al., 2017 <sup>¶</sup>  | buffaloes                      | NS                        | Rhipicephalus (280), Boophilus (150), H. an. anatolicum (30), and H. a. excavatum (40).                                                                                                                                                   | <i>A. marginale</i>                                                                                      | msp1α                         | 130/150 (86.6)                                                                                                                                                                                                                    |

|                                        |         |             |                                                                                                                   |                                                                                                                                                                                         |               |              |
|----------------------------------------|---------|-------------|-------------------------------------------------------------------------------------------------------------------|-----------------------------------------------------------------------------------------------------------------------------------------------------------------------------------------|---------------|--------------|
| Hassan et al., 2017                    | cattle  |             | R. annulatus                                                                                                      | <i>B. theileri</i>                                                                                                                                                                      | flab          | 10/172 (5.8) |
|                                        |         |             |                                                                                                                   | <i>B. bigemina</i>                                                                                                                                                                      | 18S rRNA      | 2/172 (1.16) |
|                                        | camels  |             | O. savignyi                                                                                                       | <i>B. theileri</i>                                                                                                                                                                      | flab          | 6/611 (1)    |
| Abdel-Baky et al., 2020 <sup>1</sup> ¥ | camels, |             | A. variegatum                                                                                                     | <i>B. burgdorferi</i>                                                                                                                                                                   | OspA and      | 43.24%       |
|                                        | cattle, |             | A. lepidum                                                                                                        |                                                                                                                                                                                         | flaB          | 30.63%       |
|                                        | sheep   |             | B. annulatus                                                                                                      |                                                                                                                                                                                         |               | 26.13%       |
| AL-Hosary et al. 2021b¥                | cattle  | NS          | H. excavatum                                                                                                      | <i>Theileria annulata</i>                                                                                                                                                               | RLB and       | 18.1 %       |
|                                        |         |             |                                                                                                                   | <i>Babesia occultans</i>                                                                                                                                                                | variable      | 1.8 %        |
|                                        |         |             |                                                                                                                   | <i>An. marginale</i>                                                                                                                                                                    | targets       | 28.5 %       |
|                                        |         |             |                                                                                                                   | <i>Anaplasma platys</i>                                                                                                                                                                 |               | 0.25 %       |
|                                        |         |             |                                                                                                                   | <i>Midich. mitochondrii</i>                                                                                                                                                             |               | 11.6 %       |
|                                        |         |             |                                                                                                                   | <i>Ehrl. chaffeensis-like</i>                                                                                                                                                           |               | 1.8 %        |
|                                        |         |             |                                                                                                                   | <i>Ehrlichia minasensis</i>                                                                                                                                                             |               | 1 %          |
|                                        |         |             | R. annulatus                                                                                                      | <i>T. annulata</i>                                                                                                                                                                      |               | 2.3 %        |
|                                        |         |             |                                                                                                                   | <i>B. bovis</i>                                                                                                                                                                         |               | 0.6 %        |
|                                        |         |             |                                                                                                                   | <i>A. marginale</i>                                                                                                                                                                     |               | 18.0 %       |
|                                        |         |             |                                                                                                                   | <i>A. platys</i>                                                                                                                                                                        |               | 1.2 %        |
|                                        |         |             |                                                                                                                   | <i>M. mitochondrii</i>                                                                                                                                                                  |               | 2.9 %        |
|                                        |         |             |                                                                                                                   | <i>E. minasensis</i>                                                                                                                                                                    |               | 0.6 %        |
| Abdullah et al., 2022                  | equines | NS          | R. annulatus (61)                                                                                                 | Anaplasmataceae                                                                                                                                                                         | 23S rRNA      | 9 (14.7)     |
|                                        |         |             |                                                                                                                   | <i>A. platys-like</i>                                                                                                                                                                   | 23S rRNA      | 1 (1.6)      |
|                                        |         |             |                                                                                                                   | <i>A. marginale</i>                                                                                                                                                                     | 23S rRNA      | 1 (1.6)      |
|                                        |         |             |                                                                                                                   | <i>Candidatus E. rustica</i>                                                                                                                                                            | 23S rRNA      | 4 (6.6)      |
|                                        |         |             |                                                                                                                   | <i>Ehrlichia sp.</i>                                                                                                                                                                    | 23S rRNA      | 3 (4.9)      |
|                                        |         |             |                                                                                                                   | <i>Borrelia sp.</i>                                                                                                                                                                     | 16S rRNA      | 2 (3.3)      |
|                                        |         |             |                                                                                                                   | <i>B. theileri</i>                                                                                                                                                                      | 16S rRNA      | 2 (3.3)      |
| Abdel-Shafy et al., 2012               | camels  | 10          | H. dromedarii (42)                                                                                                | <i>R. africae</i> and <i>R. aeschlimannii</i>                                                                                                                                           | gltA          | 8 (19.04)    |
|                                        |         |             | H. impeltatum (15)                                                                                                |                                                                                                                                                                                         | ompA,         | 15 (100)     |
|                                        |         |             | H. marginatum (5)                                                                                                 |                                                                                                                                                                                         | ompB, Sca4    | 1 (20)       |
| Abdullah et al., 2016                  | camels  | NS          | H. marginatum (5)                                                                                                 | <i>Rickettsia sp.</i>                                                                                                                                                                   | OmpA and gltA | 1 (20)       |
| Barghash et al., 2016¥                 | camels  | 212 (85.14) | H. dromedarii (73.65%), H. rufipes (12.03%), H. truncatum (6.62%), H. anatolicum excavatum (4.73%), H. impeltatum | <i>T. evansi</i> , <i>T. brucei</i> , <i>B. bovis</i> , <i>B. bigemina</i> and <i>Theileria sp.</i> , <i>A. marginale</i> , <i>Histophilus somni</i> , <i>Pasteurella multocida</i> and | Variable      | NS           |

|                        |        |              |                                                                                                     |                                     |                     |                                           |
|------------------------|--------|--------------|-----------------------------------------------------------------------------------------------------|-------------------------------------|---------------------|-------------------------------------------|
|                        |        |              | (1.62%), and others<br>(1.35%).                                                                     | <i>Mycoplasma spp.</i>              |                     |                                           |
| Abdullah et al., 2018  | camels | NS           | H. dromedarii (177)                                                                                 | <i>C. burnetii</i>                  | IS30A               | 10/190 (5.3)                              |
| Abdullah et al., 2019b | camels | NS           | Hayalomma spp. (99)<br>H. marginatum (5/99)                                                         | <i>Rickettsia spp. (R. africae)</i> | OmpA and<br>gltA    | 1/99 (1.01)<br>1/5 (20)                   |
| Ghoneim et al., 2020   | camels | 181<br>(100) | H. dromedarii (259)<br>A. variegatum (18)<br>H. anatolicum<br>anatolicum (19)<br>R. pulchellus (28) | <i>C. burnetii</i>                  | IS1111              | 17 (6.6)<br>1 (5.6)<br>1 (5.3)<br>1 (3.6) |
| Bendary et al., 2022   | camels | NS           | H. dromedarii (837<br>pools)<br>H. rufipes (411 pools)                                              | CCHFV                               | RT-PCR-S<br>segment | 11 (1.3)<br>7 (1.7)                       |
| Ghaffar and Amer, 2012 | dogs   | NS           | R. sanguineus (401)                                                                                 | A. phagocytophilum                  | 16S rRNA            | 55/401 (13.7)                             |
| Elhelw et al., 2014    | dogs   | NS           | R. sanguineus (12)                                                                                  | <i>B. burgdorferi</i>               | OspA                | 7 (58.3)                                  |
| Abdullah et al., 2016  | dogs   | NS           | R. sanguineus (597)                                                                                 | <i>Rickettsia sp.</i>               | OmpA<br>and gltA    | 4/71 (5.6)                                |
| Nasr et al., 2020      | dogs   | 156          | R. sanguineus (156<br>pools)                                                                        | <i>A. platys</i><br><i>E. canis</i> | 16S rRNA            | 2 (1.32)<br>3 (1.98)                      |
| Elhelw et al., 2021    | dogs   | 69 (69)      | R. sanguineus (60)                                                                                  | <i>B. burgdorferi</i>               | 16S rRNA            | 1 (1.67)                                  |

# The collected ticks were morphologically identified using published identification keys and additionally some molecular markers were used.

® Tick species and genera examined for pathogens using molecular markers

<sup>1</sup> These articles identified pathogens in ticks' pools collected from various hosts

¥ Studies were not included in Meta-analysis

**Abbreviated Tick genus:** **A.**; Amblyomma, **D.**; Dermacentor, **H.**; Hyalomma, **R.**; Rhipicephalus, **O.**; Ornithodoros

**Abbreviations:** **flaB**; encoding flagellin B, **gltA**; Citrate synthase gene, **groEL**; 'heatshock operon', **IS1111**; *C. burnetii* transposon-like sequence, **ompA**; Outer membrane protein A, **ompB**; Outer membrane protein B, **ospA**; Outer surface protein A. gene, **Sca4**; Cell surface antigen-4 (gene D).

**Supplementary Table S7:** Haplotypes of *T. annulata* Tams-1 isolates from ruminant animals in Egypt.

| Haplotype | Accession number  | Host    | Region    |
|-----------|-------------------|---------|-----------|
| Ta-1      | <b>AB917277.1</b> | Cattle  | Menoufia  |
| Ta-2      | <b>AB917296.1</b> | Cattle  | Menoufia  |
| Ta-3      | <b>AB917298.1</b> | Cattle  | Menoufia  |
| Ta-4      | <b>AB917284.1</b> | Cattle  | Behera    |
|           | <b>AB917285.1</b> | Cattle  | Giza      |
|           | <b>AB917293.1</b> | Cattle  | Menoufia  |
| Ta-5      | <b>AB917287.1</b> | Cattle  | Giza      |
| Ta-6      | <b>KJ021629.1</b> | Cattle  | El-Fayoum |
| Ta-7      | <b>MN251047.1</b> | Cattle  | Sharkia   |
|           | <b>MN251046.1</b> | Buffalo | Sharkia   |
|           | <b>MZ197896.1</b> | Cattle  | Sinai     |
|           | <b>MZ197898.1</b> | Sheep   | Sinai     |
| Ta-8      | <b>AB917294.1</b> | Cattle  | Menoufia  |
|           | <b>AB917295.1</b> | Cattle  | Menoufia  |
| Ta-9      | <b>KJ021627.1</b> | Cattle  | Assiut    |
| Ta-10     | <b>KF765518.1</b> | Cattle  | Port-Said |
| Ta-11     | <b>KF765519.1</b> | Cattle  | Port-Said |
| Ta-12     | <b>AB917281.1</b> | Cattle  | Behera    |
| Ta-13     | <b>AB917286.1</b> | Cattle  | Giza      |
| Ta-14     | <b>AB917289.1</b> | Cattle  | Giza      |
| Ta-15     | <b>AB917278.1</b> | Cattle  | Menoufia  |
| Ta-16     | <b>AB917280.1</b> | Cattle  | Behera    |
| Ta-17     | <b>AB917283.1</b> | Cattle  | Behera    |
| Ta-18     | <b>AB917300.1</b> | Cattle  | Menoufia  |
| Ta-19     | <b>MZ197897.1</b> | Goat    | Sinai     |
| Ta-20     | <b>AB917290.1</b> | Cattle  | Giza      |
| Ta-21     | <b>AB917275.1</b> | Cattle  | Menoufia  |
| Ta-22     | <b>AB917288.1</b> | Cattle  | Giza      |

|       |                   |        |            |
|-------|-------------------|--------|------------|
| Ta-23 | <b>AB917276.1</b> | Cattle | Menoufia   |
| Ta-24 | <b>AB917297.1</b> | Cattle | Menoufia   |
| Ta-25 | <b>AB917279.1</b> | Cattle | Behera     |
|       | <b>AB917282.1</b> | Cattle | Behera     |
|       | <b>AB917291.1</b> | Cattle | Behera     |
|       | <b>AB917292.1</b> | Cattle | Behera     |
| Ta-26 | <b>AB917301.1</b> | Cattle | Menoufia   |
| Ta-27 | <b>AB917302.1</b> | Cattle | Menoufia   |
| Ta-28 | <b>MH796634.1</b> | Cattle | New Valley |
|       | <b>LC549654.1</b> | Cattle | NS         |
| Ta-29 | <b>KJ021628.1</b> | Cattle | New Valley |
| Ta-30 | <b>MH796632.1</b> | Cattle | New Valley |
| Ta-31 | <b>AB917299.1</b> | Cattle | Menoufia   |
| Ta-32 | <b>KJ021626.1</b> | Cattle | El-Fayoum  |
| Ta-33 | <b>MH796633.1</b> | Cattle | New Valley |
|       | <b>LC549653.1</b> | Cattle | NS         |
